# Supplementary material for: Structure-guided engineering of adenine base editor with minimized RNA off-targeting activity
Source: PubMed Central journal article supplement (PMC8052359; doi:10.1038/s41467-021-22519-z), 2021-04-16
Supplement: 41467_2021_22519_MOESM1_ESM.pdf [file 41467_2021_22519_MOESM1_ESM.pdf]

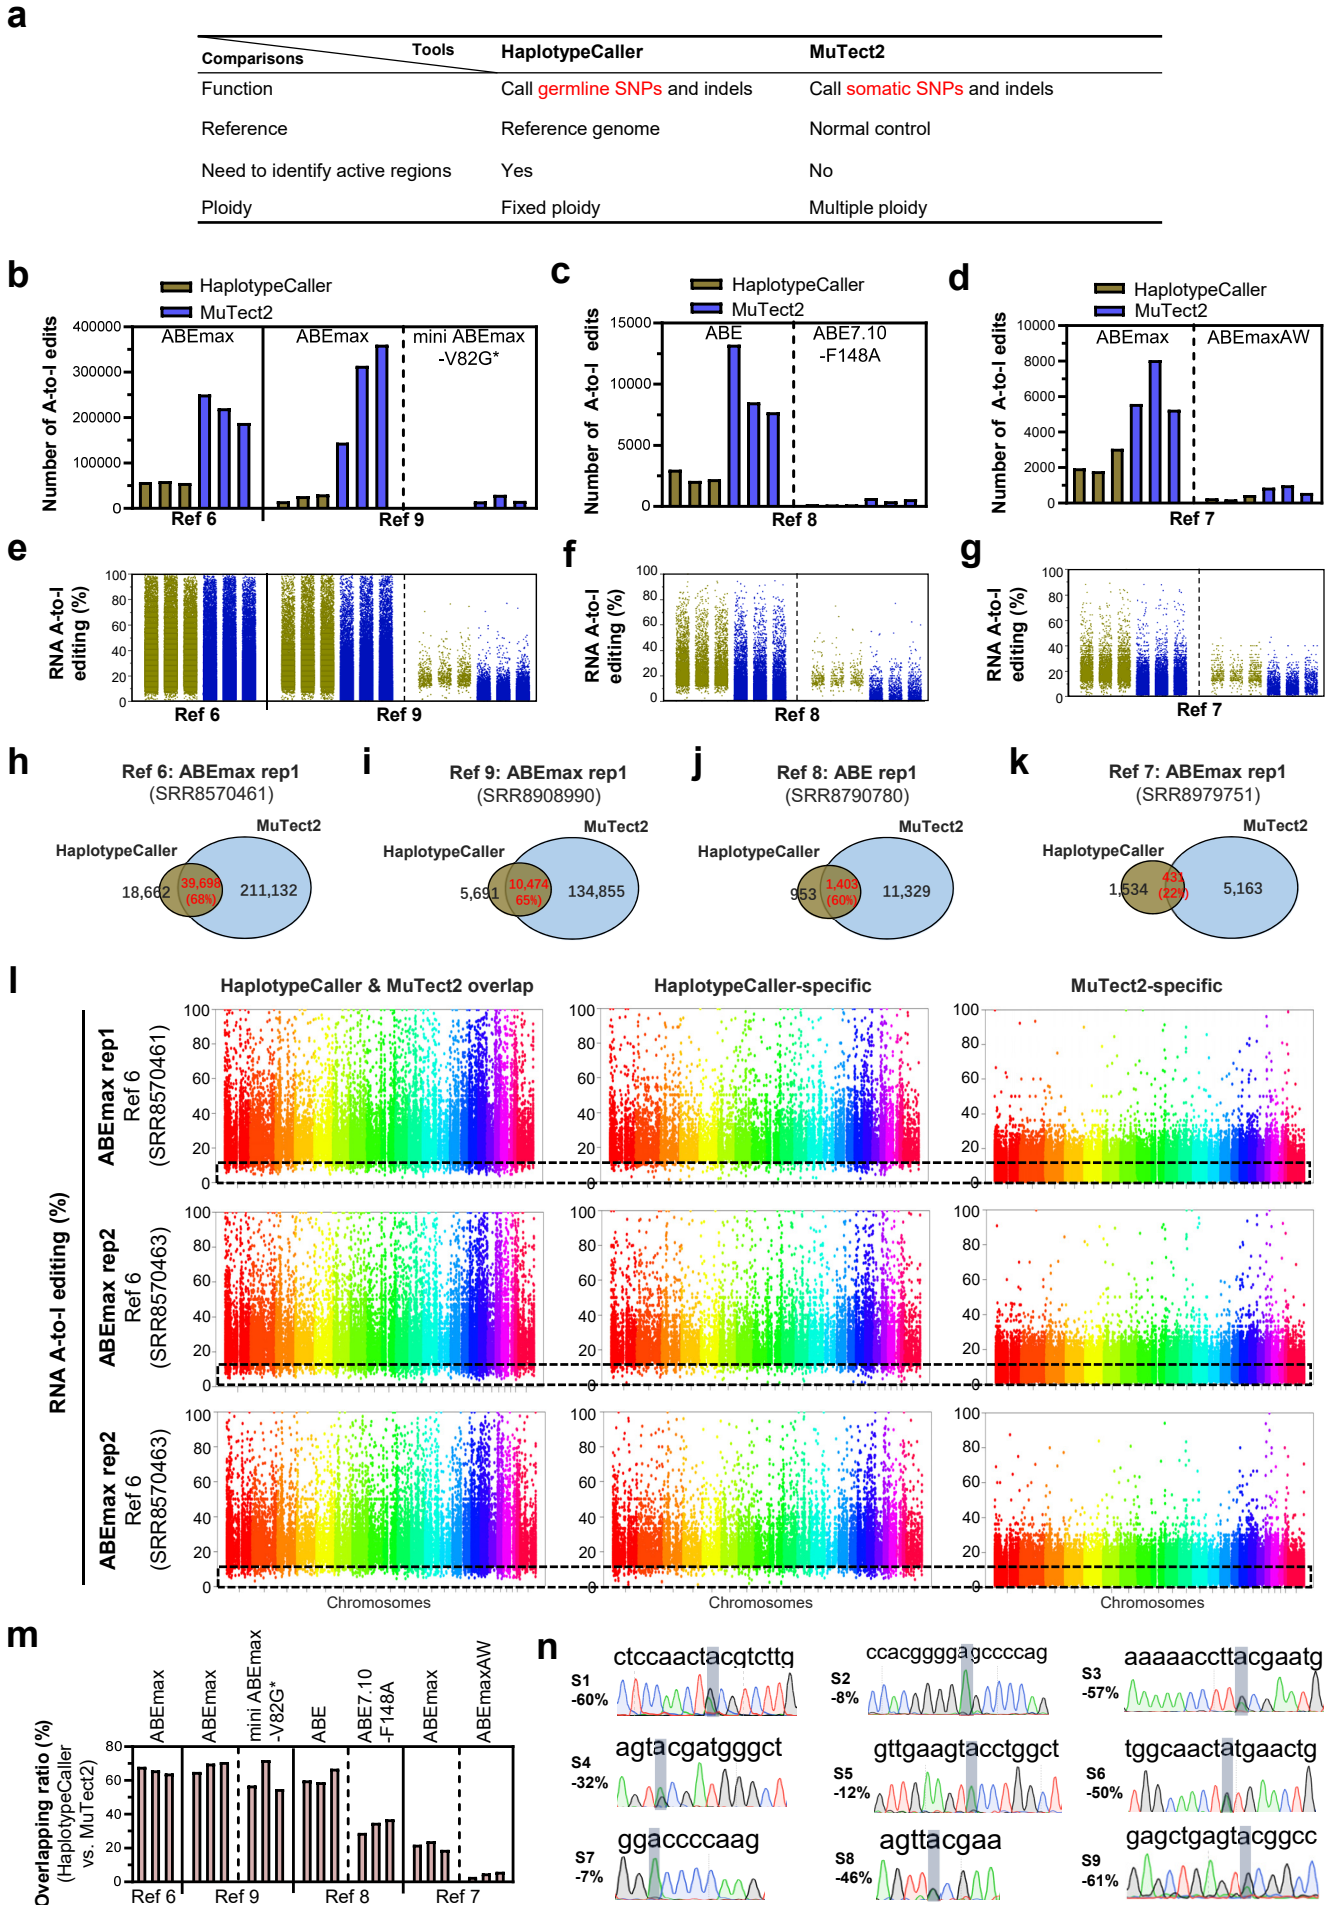

Figure S1. ABE-induced RNA off-target editing analysis.

**Figure S1. ABE-induced RNA off-target editing analysis.**

(a) Comparison of two widely used tools (HaplotypeCaller and MuTect2) for calculating SNPs.

(b-d) Calculating ABE-induced RNA off-target editing in four published papers (Ref 6-9; the detailed dataset used was listed in a Source Data file (Source Data for Sup Figures) using HaplotypeCaller and MuTect2 separately. Because there was no sequencing data available for non-transfected samples, samples expressing control GFP or Cas9n served as controls, and the RNA A-to-I edits overlapping with control were deducted for calculation.

(e-g) Jitter plots showing the efficiencies of RNA A-to-I edits from the RNA-seq data shown in b-d.

(h-k) The RNA A-to-I edits calculated by HaplotypeCaller and MuTect2 were overlapped for indicated dataset, and the number of overlapped edits and the overlapping ratio relative to HaplotypeCaller-generated edits were shown as disproportional Venn diagram for four published RNA-seq data (SRR8570461, SRR8908990, SRR8790780, and SRR8979751) (Ref 6-9).

(l) Manhattan plots showing the overlapping or exclusive distributions of RNA A-to-I edits across all chromosomes induced by ABEmax from published RNA-seq data (SRR8570461, SRR8570463, and SRR8570465) using HaplotypeCaller and MuTect2 tools. The black rectangle highlights the main difference between the results from HaplotypeCaller and MuTect2.

(m) The overlapping ratio for RNA A-to-I edits calculated by using HaplotypeCaller (as denominator) and MuTect2 tools was shown from the results shown in b-d.

(n) 9 MuTect2-specific RNA edits (ABE-MU-OFT-1 to ABE-MU-OFT-8; also shown as S1-S8) were selected for PCR validation (from cDNA) and Sanger sequencing. The A-to-G conversion efficiency was also presented. The primers for amplifying the fragments containing these edits are listed in Supplementary Table 3.

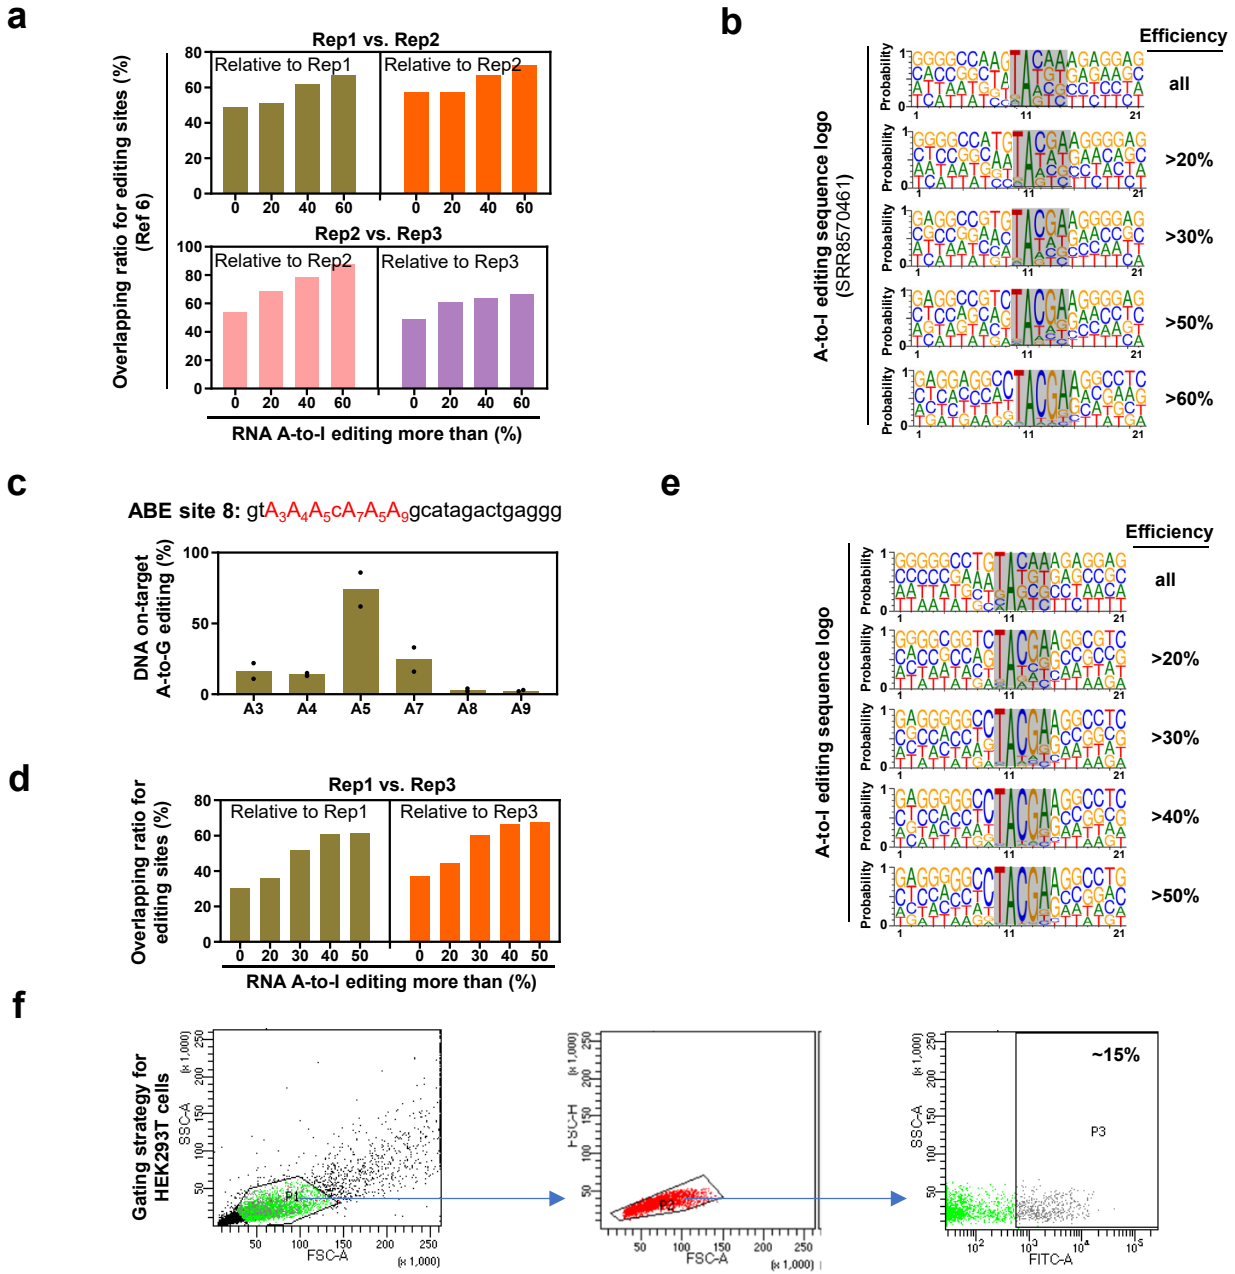

Figure S2. ABEmax induces efficient transcriptome-wide RNA editing with *E. coli* tRNA-like structure.

**Figure S2. ABEmax induces efficient transcriptome-wide RNA editing with *E.coli* tRNA-like structure.**

(a) The overlapping ratio between the three replicates (rep1, 2, and 3) (Ref 6) divided into four groups of edited adenines edits using MuTect2 (with RNA editing efficiency > 60%, > 40%, > 20%, and all).

(b) Sequence logos centered by the edited adenine (A) from a published RNA-seq data (SRR8570461 from Ref 6) for edited adenines with indicated editing efficiencies (> 60%, > 50%, > 30%, > 20%, and all).

(c) HEK293T cells were transfected with ABEmax and an sgRNA targeting ABE site 8. The DNA on-target A-to-G editing efficiency with two independent replicates was shown from Sanger sequencing data.

(d) Two replicates (ABEmax rep1 and rep3) in c were collected for RNA-seq analysis. The overlapping ratio between the two replicates divided into five groups of edits using MuTect2 (with RNA editing efficiency > 50%, > 40%, > 30%, > 20%, and all).

(e) Sequence logos centered by the edited adenine (A) from pooled RNA-seq data in d for edited adenines with indicated editing efficiencies (> 50%, > 40%, > 30%, > 20%, and all). The nucleotides around the edited A were shown (21 nucleotides in total).

(f) Gating strategy for sorting GFP-positive HEK293T cells was presented separately.

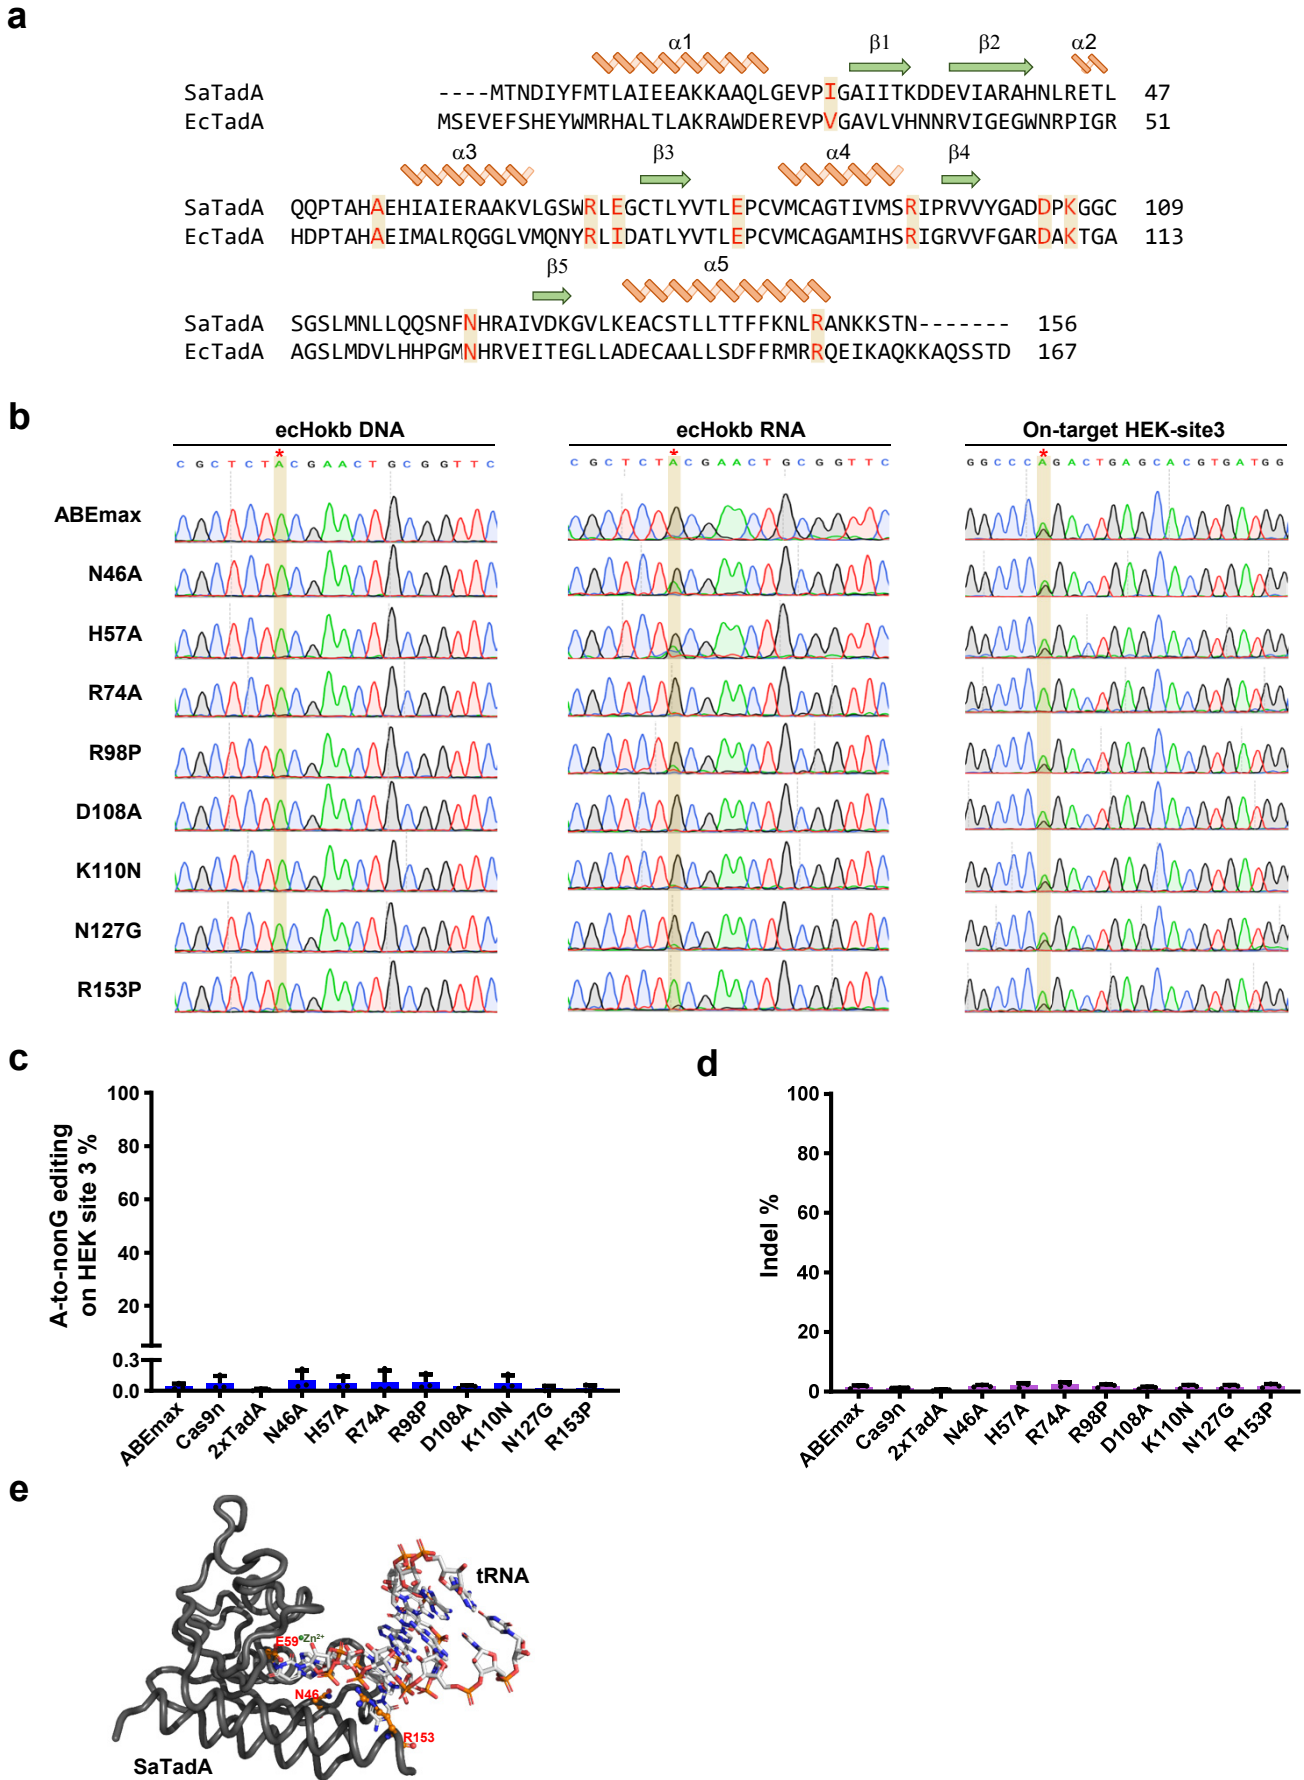

**Figure S3. Additional data for engineered ABEmax with reduced RNA editing activities.**

**Figure S3. Additional data for engineered ABEmax with reduced RNA editing activities.**

(a) Protein sequence alignment of *Staphylococcus aureus* TadA (SaTadA) and *E. coli* TadA. The conserved essential amino acids were highlighted in red. The secondary structure of TadA was also labelled.  $\alpha$ ,  $\alpha$ -helix;  $\beta$ ,  $\beta$ -sheet.

(b) Sanger sequencing for DNA A-to-G editing and RNA A-to-I editing of ecHokb induced by wild-type ABEmax and eight variants containing indicated mutations. The diagram for on-target DNA editing of HEK site 3 was also presented.

(c-d) Deep sequencing analysis of the fraction of by-products, including A-to-nonG editing (c) and indels (d), induced by wildtype ABEmax and engineered variants. Three independent replicates are presented as mean values  $\pm$  s.d..

(e) The predicted crystal structure presenting the interaction between SaTadA and tRNA. The contact sites between N46, E59, and R153 of ecTadA and tRNA were highlighted.

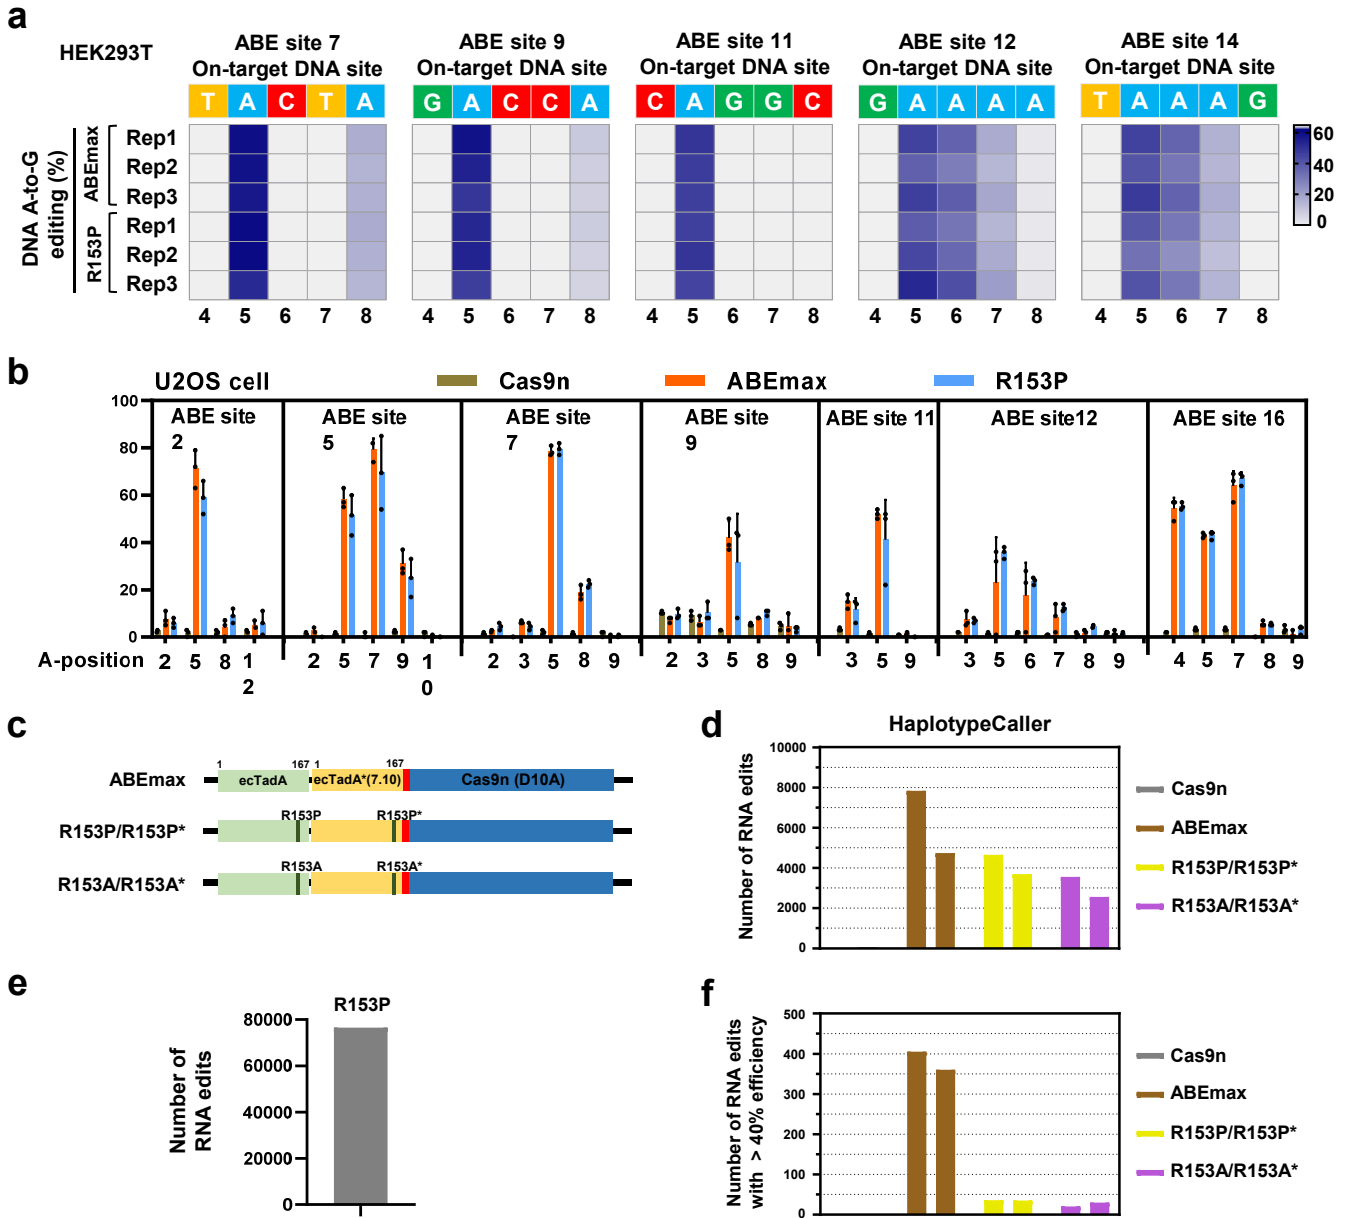

Figure S4. The DNA A-to-G editing efficiency for ABEmax variants.

**Figure S4. The DNA A-to-G editing efficiency for ABEmax variants.**

(a) Heatmaps showing the DNA on-target editing efficiencies induced by ABEmax or its variant ABEmax-R153P within the editing window (4-8 of the protospacers) of the on-target sites (ABE site 7, 9, 11, 12, and 14) in HEK293T cells by deep sequencing analysis.

(b) The on-target DNA editing events induced by ABEmax or ABEmax-R153P variant within the editing window of the seven on-target sites (ABE site 2, 5, 7, 9, 11, 12, and 16) were presented in U2OS cells by Sanger sequencing analysis in triplicates. Cas9n served as a negative control. Because the transfection efficiency for U2OS cells is very low, we isolated gDNA and RNA from FACS-sorted cells with the highest 5% of GFP signal (gating strategy was similar to HEK293T cells and top 5% GFP-positive cells were collected for analysis).

(c) Design for the engineered ABEmax variants with indicated amino acid substitutions.

(d) The number of RNA A-to-I edits by using HaplotypeCaller in Fig. 2e was presented.

(e) The number of ABEmax-R153P-induced RNA A-to-I edits (MuTect2) with one replicate was presented, which is simultaneously generated with the data in Fig. 2e.

(f) The number of RNA A-to-I edits with > 40% editing efficiency (MuTect2) in Fig. 2e was presented.



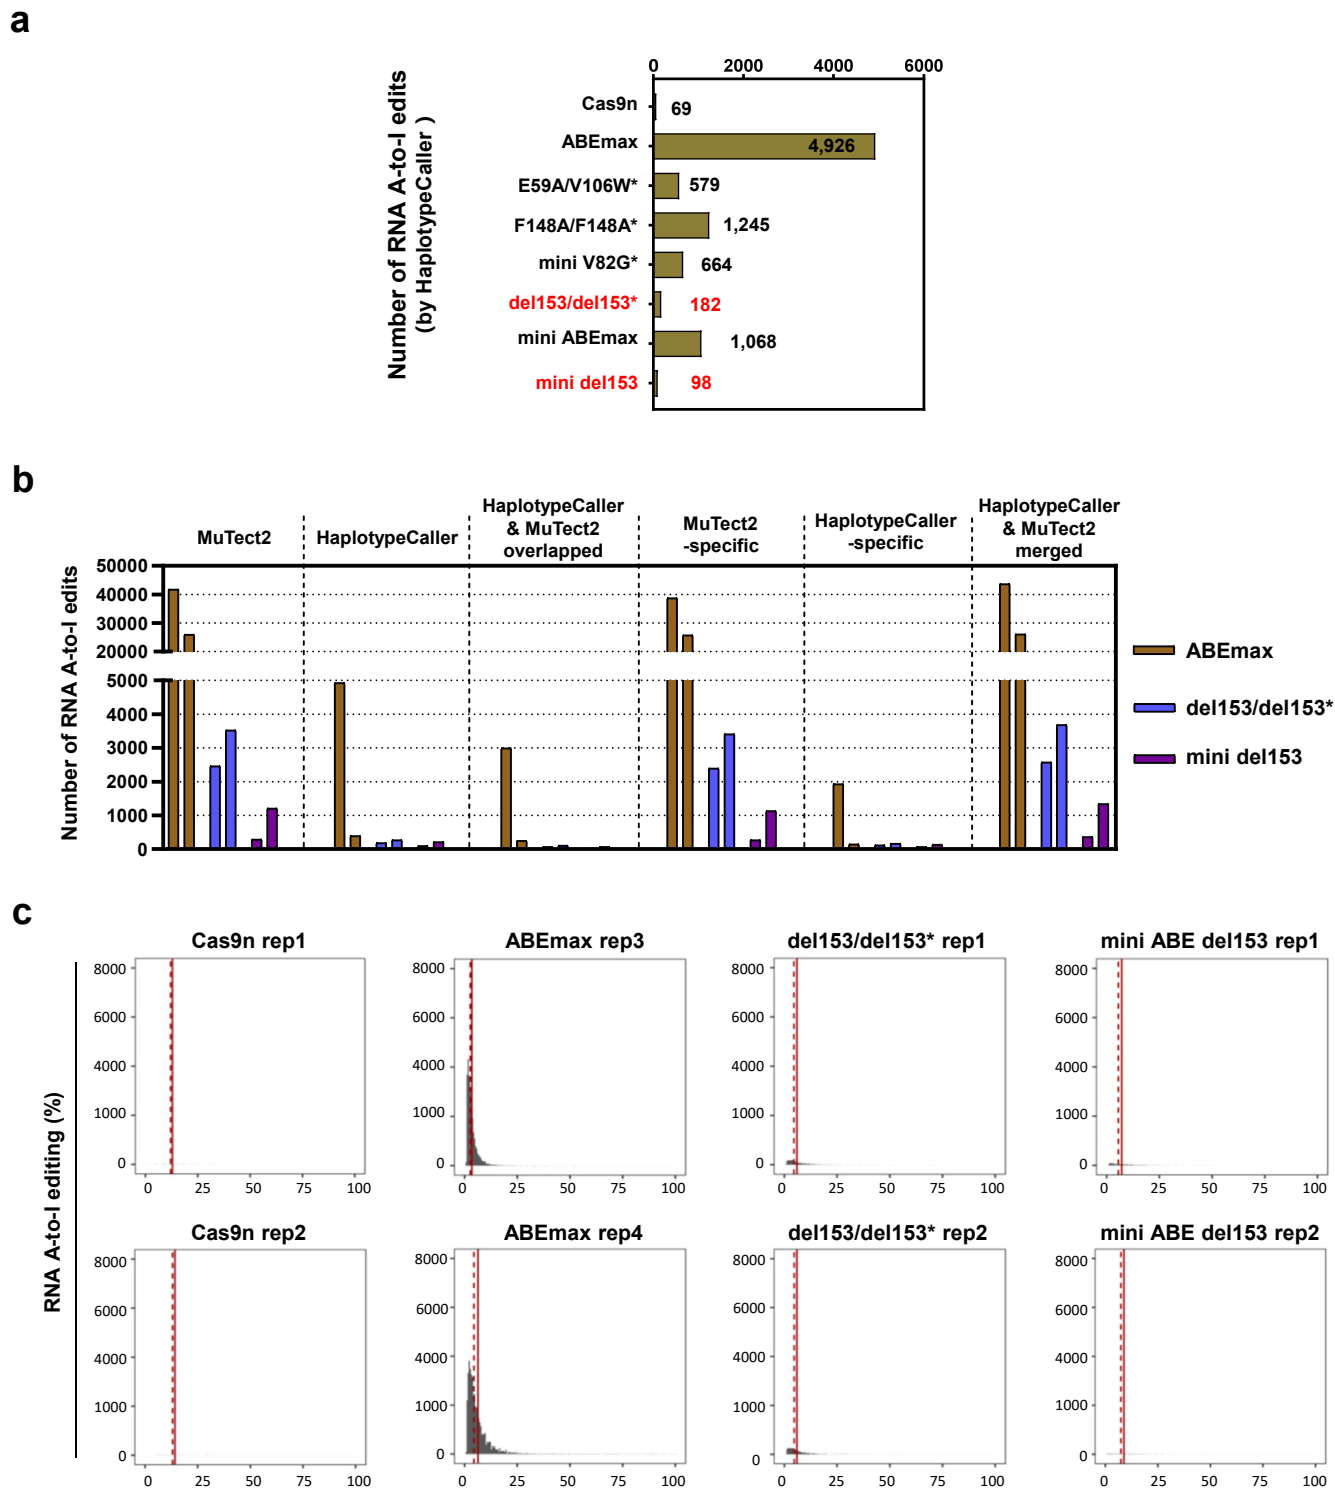

**Figure S5. Additional analysis for engineered ABEmax-induced RNA off-targeting activities.**

**Figure S5. Additional analysis for engineered ABEmax-induced RNA off-targeting activities.**

(a) The number of RNA A-to-I edits by using HaplotypeCaller in Fig. 2a was presented.

(b) The RNA A-to-I edits induced by ABEmax or its variants (del153/dele153\* and mini del153) expressed in HEK293T cells co-transfected with an sgRNA targeting ABE site 8 were calculated by using HaplotypeCaller and MuTect2 tools separately. Then, the RNA A-to-I edits generated by the two tools were overlapped for each sample, and the number of overlapped edits, HaplotypeCaller-/MuTect2-specific edits, and merged edits was shown. ABEmax, rep 3 and rep4; del153/dele153\*, rep1 and rep2; mini del153: rep1 and rep2. Two independent replicates are presented separately.

(c) Histograms showing numbers of off-target edited RNA adenines (y-axis) and corresponding RNA A-to-I editing frequencies (x-axis) for two replicates shown in Fig. 2b (using MuTect2). Solid red line represents the mean frequency, and dashed red line represents the median frequency.

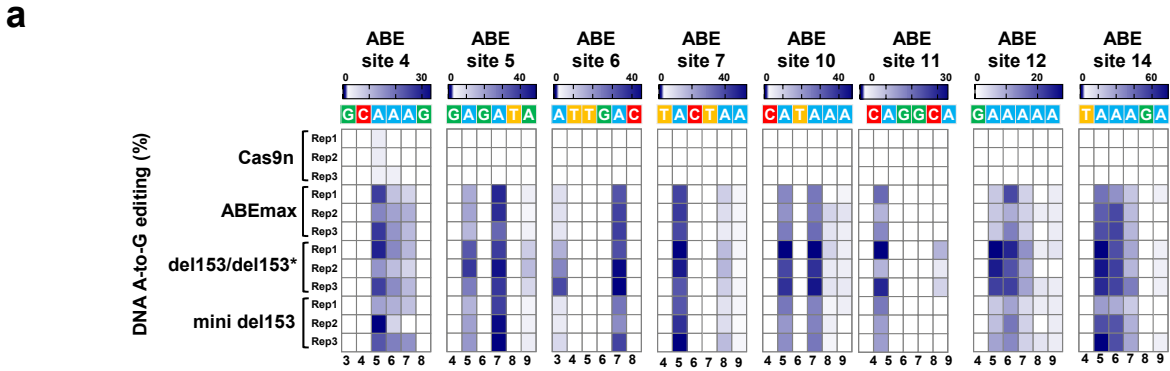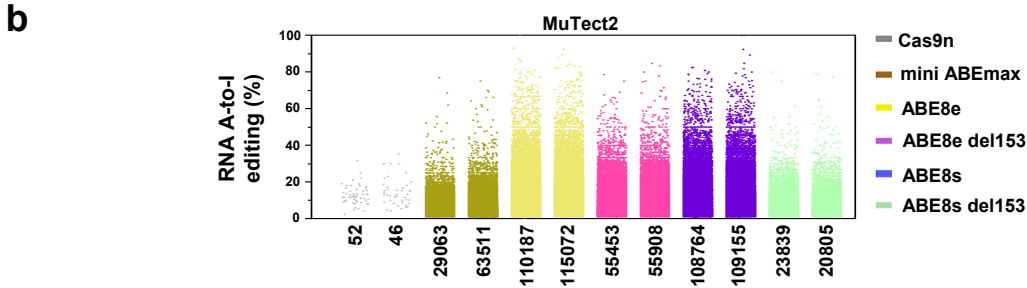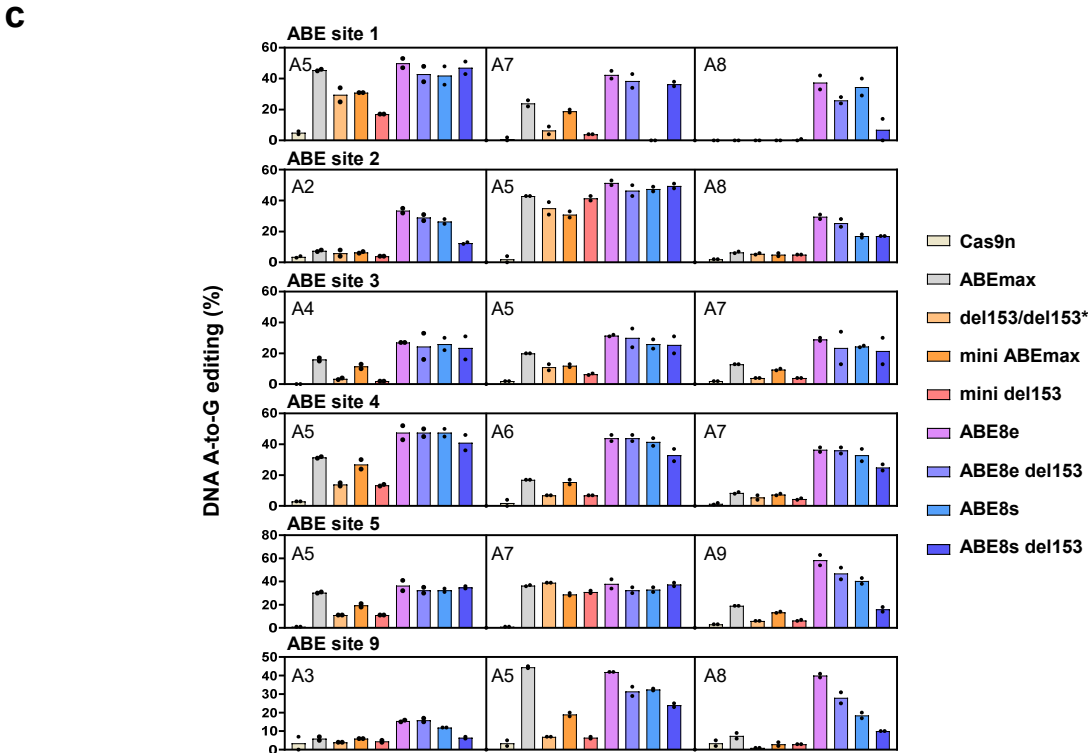

Figure S6. The DNA on-target and RNA off-target activities of engineered ABEs.

**Figure S6. The DNA on-target and RNA off-target activities of engineered ABEs.**

(a) Heat maps showing the on-target DNA A-to-G editing efficiencies of ABEmax, del153/dele153\* and mini del153 with 8 sgRNAs. Data are produced from two independent replicates. A-to-G editing efficiencies are shown in heat map format for the editing window that only includes the most highly edited adenines. Site 4-6, deep sequencing; site 7, 10, 11, 12, 14, Sanger sequencing. Numbering at the bottom of the heat map represents spacer position and “1” is calculated from the most PAM-distal nucleotide.

(b) The efficiency distributions of RNA edits calculated by MuTect2 were presented for RNA-seq experiments in HEK293T cells that expressed Cas9n, mini ABEmax, ABE8e, ABE8e del153, ABE8s, ABE8s del153 and an sgRNA targeting HEK site 8. Two independent replicates were shown. Each dot represents an edited adenine position in RNA.

(c) Bar plots showing the DNA on-target A-to-G editing efficiencies of Cas9n, ABEmax, del153/dele153\*, mini ABEmax, mini del153, ABE8e, ABE8e del153, ABE8s, ABE8s del153 with 6 sgRNAs. The efficiencies for most highly edited three adenines for each sgRNA on-target site within the editing window are reported with two independent replicates, and error bars represent s.d.

**a**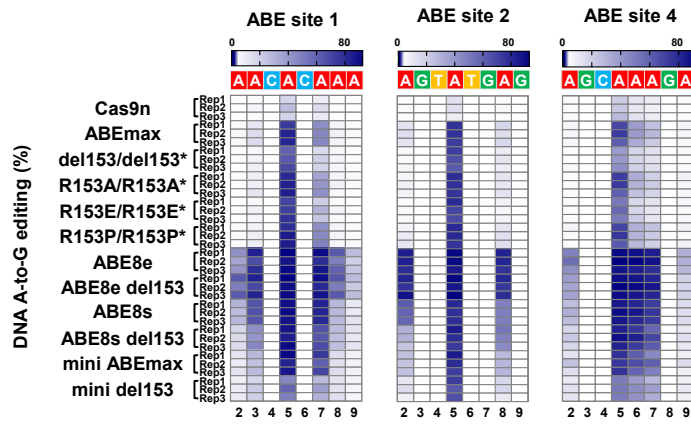**b**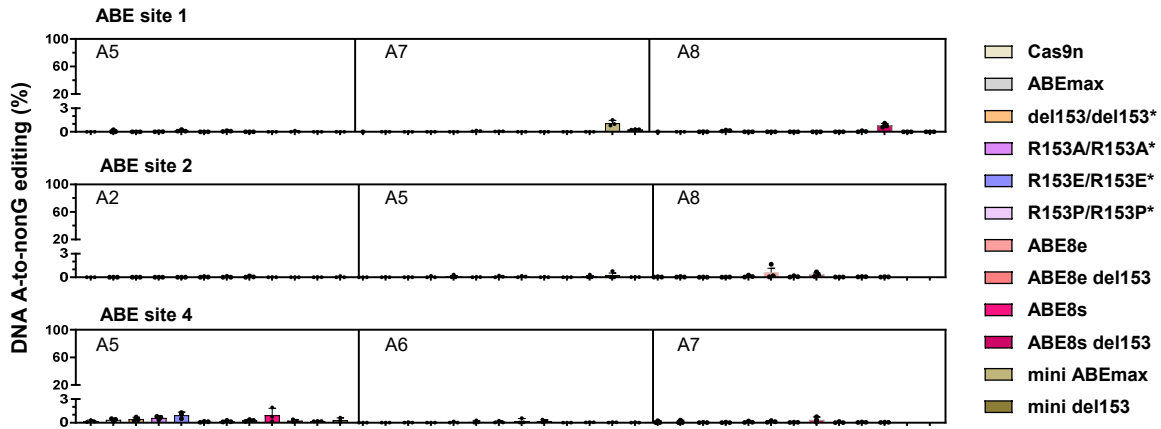**c**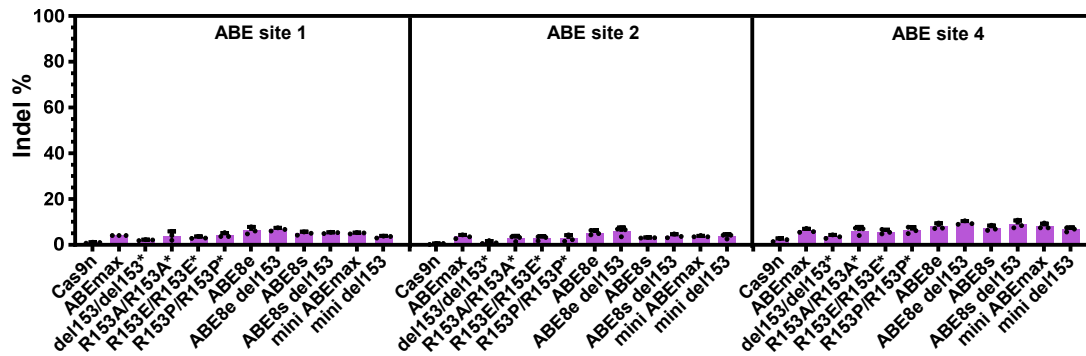

**Figure S7. Comparison of engineered ABE variants.**

**Figure S7. Comparison of engineered ABE variants.**

(a) Heat maps showing the on-target DNA A-to-G editing efficiencies of ABE<sub>max</sub> and all engineered variants used in the present study for three target sites (ABE site1, 2, and 4). Data are generated from three independent replicates with targeted deep sequencing analysis.

(b-c) Bar plot showing A-to-nonG (A-to-T and A-to-C) editing efficiencies (b) and indel rates (c) induced by indicated base editors. Three independent replicates are presented as mean values  $\pm$  s.d..

**Engineered adenine base editor with minimized RNA off-target activities**

**SUPPLEMENTARY INFORMATION TABLE**

Supplementary Table 1. Oligos used for sgRNA construction in this study

Supplementary Table 2. Primers used for plasmid construction

Supplementary Table 3. Primers used for PCR amplification and sequencing

**Supplementary Table 1. Oligos used for sgRNA construction in this study**

| Name                | Sequence                 |
|---------------------|--------------------------|
| sgHEK293-Site3 up   | ACCGGGCCCAGACTGAGCACGTGA |
| sgHEK293-Site3 down | AAACTCACGTGCTCAGTCTGGGCC |
| sgABE-Site1 up      | ACCGGAACACAAAGCATAGACTGC |
| sgABE-Site1 down    | AAACGCAGTCTATGCTTTGTGTTC |
| sgABE-Site2 up      | ACCGGAGTATGAGGCATAGACTGC |
| sgABE-Site2 down    | AAACGCAGTCTATGCCTCATACTC |
| sgABE-Site3 up      | ACCGGTCAAGAAAGCAGAGACTGC |
| sgABE-Site3 down    | AAACGCAGTCTCTGCTTTCTTGAC |
| sgABE-Site4 up      | ACCGGAGCAAAGAGAATAGACTGT |
| sgABE-Site4 down    | AAACACAGTCTATTCTCTTTGCTC |
| sgABE-Site5 up      | ACCGGATGAGATAATGATGAGTCA |
| sgABE-Site5 down    | AAACTGACTCATCATTATCTCATC |
| sgABE-Site6 up      | ACCGGGATTGACCCAGGCCAGGGC |
| sgABE-Site6 down    | AAACGCCCTGGCCTGGGTCAATCC |
| sgABE-Site7 up      | ACCGGAATACTAAGCATAGACTCC |
| sgABE-Site7 down    | AAACGGAGTCTATGCTTAGTATTC |
| sgABE-Site8 up      | ACCGGTAAACAAAGCATAGACTGA |
| sgABE-Site8 down    | AAACTCAGTCTATGCTTTGTTTAC |
| sgABE-Site10 up     | ACCGGAACATAAAGAATAGAATGA |
| sgABE-Site10 down   | AAACTCATTCTATTCTTTATGTTC |
| sgABE-Site11 up     | ACCGGGACAGGCAGCATAGACTGT |
| sgABE-Site11 down   | AAACACAGTCTATGCTGCCTGTCC |
| sgABE-Site12 up     | ACCGGTAGAAAAAGTATAGACTGC |
| sgABE-Site12 down   | AAACGCAGTCTATACTTTTTCTAC |
| sgABE-Site14 up     | ACCGGGCTAAAGACCATAGACTGT |
| sgABE-Site14 down   | AAACACAGTCTATGGTCTTTAGCC |



**Supplementary Table 2. Primers used for plasmid construction**

| Name              | Sequence                                    |
|-------------------|---------------------------------------------|
| CMV-<br>NdeI-F    | GGCAGTACATCAAGTGTATCATATGCCAAGTACGCCCC      |
| nCas9-<br>BglII-R | GGCCATCTCGTTGCTGAAGATCTCTTGCAGATAGC         |
| TadA-<br>N46A-F   | AATAGAGTGATCGGAGAGGGATGGCAAAGGCCAATCGGCCG   |
| TadA-<br>N46A-R   | GGCGGCCGATTGGCCTTTGCCATCCCTCTCCGATCACTCTATT |
| TadA-<br>H57A-F   | ACGACCCTACCGCAGCAGCAGAGATCATGGCAC           |
| TadA-<br>H57A-R   | GTGCCATGATCTCTGCTGCTGCGGTAGGGTCGT           |
| TadA-<br>R74A-F   | GGTCATGCAGAATTACGCGCTGATCGATGCCACC          |
| TadA-<br>R74A-R   | ACAGGGTGGCATCGATCAGCGCGTAATTCTGCATGACC      |
| TadA-<br>E85K-F   | CCTGTATGTGACACTGAAACCATGCGTGATGTGCGCA       |
| TadA-<br>E85K-R   | TGCGCACATCACGCATGGTTTCAGTGTCACATACAGG       |
| TadA*-<br>R98P-F  | GCCATGATCCACTCTCCGATCGGCCGCGTGGTGT          |
| TadA*-<br>R98P-R  | AACACCACGCGGCCGATCGGAGAGTGGATCATGGC         |
| TadA-<br>D108A-F  | GTGTTTCGGAGCACGGGCAGCCAAGACCGGCGCA          |
| TadA-<br>D108A-R  | TGCGCCGGTCTTGGCTGCCCCGTGCTCCGAACAC          |
| TadA-<br>K110N-F  | GGAGCACGGGACGCCAAAACCGGCGCAGCAGGCT          |

|                  |                                                        |
|------------------|--------------------------------------------------------|
| TadA-<br>K110N-R | AGCCTGCTGCGCCGGTTTTGGCGTCCCGTGCTCC                     |
| TadA*<br>N127G-F | CACTACCCCGGCATGGGACACCGCGTCGAAATTA                     |
| TadA*<br>N127G-R | CTCGGTAATTTGACGCGGTGTCCCATGCCGGGGTAGT                  |
| TadA-<br>R153P-F | TCTTTAGAATGCGGCCACAGGAGATCAAGGCC                       |
| TadA-<br>R153P-R | GGCCTTGATCTCCTGTGGCCGCATTCTAAAGA                       |
| SbfI-HokB-<br>F  | AACGCGTG CAGGCCCTGCAGGGCGCCACCATGAAGCACAACCC           |
| SpeI-<br>HokB-R  | TTTGAACCCATGCTTCCGAATTCCTGGACGTGCAGGC                  |
| TadA-<br>R153A-F | TTCTTTAGAATGCGGGCGCCAGGAGATCAAGGCC                     |
| TadA-<br>R153A-R | GGCCTTGATCTCCTGGCGCCGCATTCTAAAGAA                      |
| TadA*<br>R153A-F | GCCCTGCTGTGCTATTTCTTTCGGATGCCTCCCCAGGTGTTCAATGCT       |
| TadA*<br>R153A-R | AGCATTGAACACCTGGGGAGGCATCCGAAAGAAATAGCACAGCAGG<br>GCGG |
| TadA-<br>E59A-F  | ACCCTACCGCACACGCAGCAATCATGGCACTGAGGCA                  |
| TadA-<br>E59A-R  | TGCCTCAGTGCCATGATTGCTGCGTGTGCGGTAGGGT                  |
| TadA*<br>V106W-F | CGCGTG GTGTTTGGCTGGAGGAACGCAAAAACC                     |
| TadA*<br>V106W-R | GGTTTTTGCGTTCCTCCAGCCAAACACCACGCG                      |
| TadA-<br>F148A-F | GCCCTGCTGAGCGATGCCTTTAGAATGCGGCCA                      |

|                         |                                         |
|-------------------------|-----------------------------------------|
| TadA-<br>F148A-R        | TGGCCGCATTCTAAAGGCATCGCTCAGCAGGGC       |
| TadA*<br>F148A-F        | GCCCTGCTGTGCTATGCCTTTCGGATGCCTAGA       |
| TadA*<br>F148A-R        | TCTAGGCATCCGAAAGGCATAGCACAGCAGGGC       |
| TadA-<br>V82G-F         | CGATGCCACCCTGTATGGAACACTGGAGCCATGCGT    |
| TadA-<br>V82G-R         | ACGCATGGCTCCAGTGTTCATACAGGGTGGCATCG     |
| TadA*<br>V82G-F         | ATTGACGCCACCCTGTACGGTACATTCGAGCCTTGC    |
| TadA*<br>V82G-R         | GCAAGGCTCGAATGTACCGTACAGGGTGGCGTCAAT    |
| TadA-<br>K20AR21<br>A-F | GCACTGACCCTGGCAGCGGCGGCATGGGATGAA       |
| TadA-<br>K20AR21<br>A-R | TTCATCCCATGCCGCCGCTGCCAGGGTCAGTGC       |
| TadA*<br>K20AR21<br>A-F | CATGCCCTGACCCTGGCCATTATAGCACGCGATGAGAGG |
| TadA*<br>K20AR21<br>A-R | CCTCTCATCGCGTGCTATAATGGCCAGGGTCAGGGCATG |
| miniABE-F               | AAGAAGCGGAAAGTCTCTGAGGTGGAGTTT          |
| miniABE-<br>R           | GAAAACCTCCACCTCAGAGACTTTCGGCTTCTT       |
| TadA-<br>del153-F       | TTCTTTAGAATGCGGCAGGAGATCAAGGCC          |

|                   |                                                         |
|-------------------|---------------------------------------------------------|
| TadA-<br>del153-R | GGCCTTGATCTCCTGCCGCATTCTAAAGAA                          |
| TadA*<br>del153-F | GCCCTGCTGTGCTATTTCTTTCGGATGCCTCAGGTGTTCAATGCTCAG        |
| TadA*<br>del153-R | CTGAGCATTGAACACCTGTCTAGGCATCCGAAAATAGCACAGCAGGG<br>CGGC |
| TadA-<br>del148-F | GCCCTGCTGAGCGATTTTAGAATGCGGCCACAG                       |
| TadA-<br>del148-R | CTGTGGCCGCATTCTAAAATCGCTCAGCAGGGC                       |
| TadA*<br>del148-F | GCCCTGCTGTGCTATTTTCGGATGCCTAGACAGG                      |
| TadA*<br>del148-R | GTCTAGGCATCCGAAAATAGCACAGCAGGGCGGC                      |
| SbfI-HokB-<br>F   | AACGCGTGCAGGCCCTGCAGGGCGCCACCATGAAGCACAACCC             |
| SpeI-<br>HokB-R   | TTTGAACCCATGCTTCCGAATTCCTGGACGTGCAGGC                   |

**Supplementary Table 3. Primers used for PCR amplification and deep sequencing**

| Primer name       | Primer sequence                |
|-------------------|--------------------------------|
| HEK293-Site3 F    | GGGAAACGCCCATGCAATTAG          |
| HEK293-Site3 R    | CTGCACCGGGATACTGGTTGAC         |
| HEK293 site3 F-1  | ATCACGTCTGCTGCAAGTAAGCATGC     |
| HEK293 site3 F-2  | CGATGTATCTGCTGCAAGTAAGCATGC    |
| HEK293 site3 F-3  | TTAGGCTCTCTGCTGCAAGTAAGCATGC   |
| HEK293 site3 F-4  | TGACCACGATCTGCTGCAAGTAAGCATGC  |
| HEK293 site3 F-5  | ACAGTGGATGTCTGCTGCAAGTAAGCATGC |
| HEK293 site3 F-6  | GCCAATTCTGCTGCAAGTAAGCATGC     |
| HEK293 site3 F-7  | CAGATCATCTGCTGCAAGTAAGCATGC    |
| HEK293 site3 F-8  | ACTTGATGTCTGCTGCAAGTAAGCATGC   |
| HEK293 site3 F-9  | GATCAGCACTCTGCTGCAAGTAAGCATGC  |
| HEK293 site3 F-10 | TAGCTTGTGCTCTGCTGCAAGTAAGCATGC |
| HEK293 site3 F-11 | GGCTACTCTGCTGCAAGTAAGCATGC     |
| HEK293 site3 F-12 | CTTGTAATCTGCTGCAAGTAAGCATGC    |
| HEK293 site3 F-13 | AGTCAATCTCTGCTGCAAGTAAGCATGC   |
| HEK293 site3 F-14 | AGTTCCTTCTGCTGCAAGTAAGCATGC    |
| HEK293 site3 F-15 | ATGTCAGCTCTGCTGCAAGTAAGCATGC   |
| HEK293 site3 F-16 | CCGTCCATTCTGCTGCAAGTAAGCATGC   |
| HEK293 site3 F-17 | GTAGAGCTCTGCTGCAAGTAAGCATGC    |
| HEK293 site3 F-18 | GTCCGCATCTGCTGCAAGTAAGCATGC    |
| HEK293 site3 F-19 | GTGAAATCTGCTGCAAGTAAGCATGC     |
| HEK293 site3 F-20 | GTGGCCTTCTGCTGCAAGTAAGCATGC    |
| HEK293 site3 F-21 | GTTTCGTCTGCTGCAAGTAAGCATGC     |
| HEK293 site3 F-22 | CGTACGGTCTGCTGCAAGTAAGCATGC    |
| HEK293 site3 F-23 | GAGTGGAGTCTGCTGCAAGTAAGCATGC   |
| ABEsite1-F        | GGACGTCTGCCCAATATGTA           |
| ABEsite1-R        | CAGCCCCATCTGTCAAACCTG          |
| ABEsite1-F-1      | ATCACGGGACGTCTGCCCAATATGTA     |
| ABEsite1-F-2      | CGATGTAGGACGTCTGCCCAATATGTA    |

|               |                                 |
|---------------|---------------------------------|
| ABEsite1-F-3  | TTAGGCTCGGACGTCTGCCCAATATGTA    |
| ABEsite1-F-4  | TGACCACGAGGACGTCTGCCCAATATGTA   |
| ABEsite1-F-5  | ACAGTGGATGGGACGTCTGCCCAATATGTA  |
| ABEsite1-F-6  | GCCAATGGACGTCTGCCCAATATGTA      |
| ABEsite1-F-7  | CAGATCAGGACGTCTGCCCAATATGTA     |
| ABEsite1-F-8  | ACTTGATGGGACGTCTGCCCAATATGTA    |
| ABEsite1-F-9  | GATCAGCACGGACGTCTGCCCAATATGTA   |
| ABEsite1-F-10 | TAGCTTGTGCGGACGTCTGCCCAATATGTA  |
| ABEsite1-F-11 | GGCTACGGACGTCTGCCCAATATGTA      |
| ABEsite1-F-12 | CTTGTAAGGACGTCTGCCCAATATGTA     |
| ABEsite1-F-13 | AGTCAATCGGACGTCTGCCCAATATGTA    |
| ABEsite1-F-14 | AGTTCCTGGACGTCTGCCCAATATGTA     |
| ABEsite1-F-15 | ATGTCAGCGGACGTCTGCCCAATATGTA    |
| ABEsite1-F-16 | CCGTCCATGGACGTCTGCCCAATATGTA    |
| ABEsite1-F-17 | GTAGAGCGGACGTCTGCCCAATATGTA     |
| ABEsite1-F-18 | GTCCGCAGGACGTCTGCCCAATATGTA     |
| ABEsite1-F-19 | GTGAAAGGACGTCTGCCCAATATGTA      |
| ABEsite1-F-20 | GTGGCCTGGACGTCTGCCCAATATGTA     |
| ABEsite1-F-21 | GTTTCGGGACGTCTGCCCAATATGTA      |
| ABEsite1-F-22 | CGTACGGGGACGTCTGCCCAATATGTA     |
| ABEsite1-F-23 | GAGTGGAGGGACGTCTGCCCAATATGTA    |
| ABEsite1-F-24 | GGTAGCAGGACGTCTGCCCAATATGTA     |
| ABEsite2-F    | CCTGAGATACAGTCACGAGGT           |
| ABEsite2-R    | TCCTGAAATGCTGTGCGTGT            |
| ABEsite2-F-1  | ATCACGCCTGAGATACAGTCACGAGGT     |
| ABEsite2-F-2  | CGATGTACCTGAGATACAGTCACGAGGT    |
| ABEsite2-F-3  | TTAGGCTCCCTGAGATACAGTCACGAGGT   |
| ABEsite2-F-4  | TGACCACGACCTGAGATACAGTCACGAGGT  |
| ABEsite2-F-5  | ACAGTGGATGCCTGAGATACAGTCACGAGGT |
| ABEsite2-F-6  | GCCAATCCTGAGATACAGTCACGAGGT     |
| ABEsite2-F-7  | CAGATCACCTGAGATACAGTCACGAGGT    |
| ABEsite2-F-8  | ACTTGATGCCTGAGATACAGTCACGAGGT   |

|               |                                 |
|---------------|---------------------------------|
| ABEsite2-F-9  | GATCAGCACCTGAGATACAGTCACGAGGT   |
| ABEsite2-F-10 | TAGCTTGTGCCCTGAGATACAGTCACGAGGT |
| ABEsite2-F-11 | GGCTACCCTGAGATACAGTCACGAGGT     |
| ABEsite2-F-12 | CTTGTAACCTGAGATACAGTCACGAGGT    |
| ABEsite2-F-13 | AGTCAATCCCTGAGATACAGTCACGAGGT   |
| ABEsite2-F-14 | AGTTCCTCCTGAGATACAGTCACGAGGT    |
| ABEsite2-F-15 | ATGTCAGCCCTGAGATACAGTCACGAGGT   |
| ABEsite2-F-16 | CCGTCCATCCTGAGATACAGTCACGAGGT   |
| ABEsite2-F-17 | GTAGAGCCCTGAGATACAGTCACGAGGT    |
| ABEsite2-F-18 | GTCCGCACCTGAGATACAGTCACGAGGT    |
| ABEsite2-F-19 | GTGAAACCTGAGATACAGTCACGAGGT     |
| ABEsite2-F-20 | GTGGCCTCCTGAGATACAGTCACGAGGT    |
| ABEsite2-F-21 | GTTTCGCCTGAGATACAGTCACGAGGT     |
| ABEsite2-F-22 | CGTACGGCCTGAGATACAGTCACGAGGT    |
| ABEsite2-F-23 | GAGTGGAGCCTGAGATACAGTCACGAGGT   |
| ABEsite2-F-24 | GGTAGCACCTGAGATACAGTCACGAGGT    |
| ABEsite3-F    | GCTTTTCACCGACTGCACAG            |
| ABEsite3-R    | CCGACAGCCAGTGGTTAAGT            |
| ABEsite3-F-1  | ATCACGGCTTTTCACCGACTGCACAG      |
| ABEsite3-F-2  | CGATGTAGCTTTTCACCGACTGCACAG     |
| ABEsite3-F-3  | TTAGGCTCGCTTTTCACCGACTGCACAG    |
| ABEsite3-F-4  | TGACCACGAGCTTTTCACCGACTGCACAG   |
| ABEsite3-F-5  | ACAGTGGATGGCTTTTCACCGACTGCACAG  |
| ABEsite3-F-6  | GCCAATGCTTTTCACCGACTGCACAG      |
| ABEsite3-F-7  | CAGATCAGCTTTTCACCGACTGCACAG     |
| ABEsite3-F-8  | ACTTGATGGCTTTTCACCGACTGCACAG    |
| ABEsite3-F-9  | GATCAGCACGCTTTTCACCGACTGCACAG   |
| ABEsite3-F-10 | TAGCTTGTGCGCTTTTCACCGACTGCACAG  |
| ABEsite3-F-11 | GGCTACGCTTTTCACCGACTGCACAG      |
| ABEsite3-F-12 | CTTGTAAGCTTTTCACCGACTGCACAG     |
| ABEsite3-F-13 | AGTCAATCGCTTTTCACCGACTGCACAG    |
| ABEsite3-F-14 | AGTTCCTGCTTTTCACCGACTGCACAG     |

|               |                               |
|---------------|-------------------------------|
| ABEsite3-F-15 | ATGTCAGCGCTTTTCACCGACTGCACAG  |
| ABEsite3-F-16 | CCGTCCATGCTTTTCACCGACTGCACAG  |
| ABEsite3-F-17 | GTAGAGCGCTTTTCACCGACTGCACAG   |
| ABEsite3-F-18 | GTCCGCAGCTTTTCACCGACTGCACAG   |
| ABEsite3-F-19 | GTGAAAGCTTTTCACCGACTGCACAG    |
| ABEsite3-F-20 | GTGGCCTGCTTTTCACCGACTGCACAG   |
| ABEsite3-F-21 | GTTTCGGCTTTTCACCGACTGCACAG    |
| ABEsite3-F-22 | CGTACGGGCTTTTCACCGACTGCACAG   |
| ABEsite3-F-23 | GAGTGGAGGCTTTTCACCGACTGCACAG  |
| ABEsite3-F-24 | GGTAGCAGCTTTTCACCGACTGCACAG   |
| ABEsite4-F    | TCCTTGCACTGAGACCGTGAA         |
| ABEsite4-R    | CTGCACCTAGCCTCCATGTC          |
| ABEsite4-F-1  | ATCACGTCTTGCACTGAGACCGTGAA    |
| ABEsite4-F-2  | CGATGTATCCTTGCACTGAGACCGTGAA  |
| ABEsite4-F-3  | TTAGGCTCTCCTTGCACTGAGACCGTGAA |
| ABEsite5-F    | GTCTGAGGTCACACAGTGGG          |
| ABEsite5-R    | TCTGAGAGCAGGGACCACATC         |
| ABEsite5-F-1  | ATCACGGTCTGAGGTCACACAGTGGG    |
| ABEsite5-F-2  | CGATGTAGTCTGAGGTCACACAGTGGG   |
| ABEsite5-F-3  | TTAGGCTCGTCTGAGGTCACACAGTGGG  |
| ABEsite6-F    | GGGAAACGCCCATGCAATTA          |
| ABEsite6-R    | GTCAACCAGTATCCCAGTGC          |
| ABEsite6-F-1  | ATCACGGGGAAACGCCCATGCAATTA    |
| ABEsite6-F-2  | CGATGTAGGGAAACGCCCATGCAATTA   |
| ABEsite6-F-3  | TTAGGCTCGGGAAACGCCCATGCAATTA  |
| ABEsite7-F    | GATGCCCTCCATCTTCTCCG          |
| ABEsite7-R    | TAGGTTTGCATAGACCTGCCC         |
| ABEsite7-F-1  | ATCACGGATGCCCTCCATCTTCTCCG    |
| ABEsite7-F-2  | CGATGTAGATGCCCTCCATCTTCTCCG   |
| ABEsite7-F-3  | TTAGGCTCGATGCCCTCCATCTTCTCCG  |
| ABEsite8-F    | GCAAGGCTGCTAGAAGTTTCA         |
| ABEsite8-R    | GCAGAAGGAATAACAGTGCCC         |



|               |                                |
|---------------|--------------------------------|
| ABEsite8-F-1  | ATCACGGCAAGGCTGCTAGAAGTTTCA    |
| ABEsite8-F-2  | CGATGTAGCAAGGCTGCTAGAAGTTTCA   |
| ABEsite8-F-3  | TTAGGCTCGCAAGGCTGCTAGAAGTTTCA  |
| ABEsite9-F    | CCTCCATCTTCCTACACGCC           |
| ABEsite9-R    | GAACAGGCAGCGTATTGCTT           |
| ABEsite9-F-1  | ATCACGCCTCCATCTTCCTACACGCC     |
| ABEsite9-F-2  | CGATGTACCTCCATCTTCCTACACGCC    |
| ABEsite9-F-3  | TTAGGCTCCCTCCATCTTCCTACACGCC   |
| ABEsite10-F   | TCCACCTCCCCACTTCTCTT           |
| ABEsite10-R   | GGTGAAATGAGCAAGGCACA           |
| ABEsite10-F-1 | ATCACGTCCACCTCCCCACTTCTCTT     |
| ABEsite10F--2 | CGATGTATCCACCTCCCCACTTCTCTT    |
| ABEsite10-F-3 | TTAGGCTCTCCACCTCCCCACTTCTCTT   |
| ABEsite11-F   | AACCACCTGCAGAGGACTACT          |
| ABEsite11-R   | GAAGGCCTAGAAAGAGACAGC          |
| ABEsite11-F-1 | ATCACGAACCACCTGCAGAGGACTACT    |
| ABEsite11-F-2 | CGATGTAAACCACCTGCAGAGGACTACT   |
| ABEsite11-F-3 | TTAGGCTCAACCACCTGCAGAGGACTACT  |
| ABEsite12-F   | TGGTGATTATGGTTACACAGCG         |
| ABEsite12-R   | ACCCATGTGCCTGACATAGG           |
| ABEsite12-F-1 | ATCACGTGGTGATTATGGTTACACAGCG   |
| ABEsite12-F-2 | CGATGTATGGTGATTATGGTTACACAGCG  |
| ABEsite12-F-3 | TTAGGCTCTGGTGATTATGGTTACACAGCG |
| ABEsite13-F   | TATCAAACACTGGGTCAT             |
| ABEsite13-R   | CAAGCCAAATTCAACAAC             |
| ABEsite13-F-1 | ATCACGTATCAAACACTGGGTCAT       |
| ABEsite13-F-2 | CGATGTATATCAAACACTGGGTCAT      |
| ABEsite13-F-3 | TTAGGCTCTATCAAACACTGGGTCAT     |
| ABEsite14-F   | GGATTACAGCCTGAGCCA             |
| ABEsite14-R   | CCAAGTGGTAACCCACAAA            |
| ABEsite14-F-1 | ATCACGGGATTACAGCCTGAGCCA       |
| ABEsite14-F-2 | CGATGTAGGATTACAGCCTGAGCCA      |

|                |                            |
|----------------|----------------------------|
| ABEsite14-F-3  | TTAGGCTCGGATTACAGCCTGAGCCA |
| ABE-site16-F   | TCCTGAGGTCTAGGAACCCG       |
| ABE-site16-R   | GGGAGGTGGAGAGAGGATGT       |
| HokB F-1       | ATCACGATGAAGCACAACCCT      |
| HokB F-2       | CGATGTAATGAAGCACAACCCT     |
| HokB F-3       | TTAGGCTCATGAAGCACAACCCT    |
| HokB F-4       | TGACCACGAATGAAGCACAACCCT   |
| HokB F-5       | ACAGTGGATGATGAAGCACAACCCT  |
| HokB F-6       | GCCAATATGAAGCACAACCCT      |
| HokB F-7       | CAGATCAATGAAGCACAACCCT     |
| HokB F-8       | ACTTGATGATGAAGCACAACCCT    |
| HokB F-9       | GATCAGCACATGAAGCACAACCCT   |
| HokB F-10      | TAGCTTGTGCATGAAGCACAACCCT  |
| HokB F-11      | GGCTACATGAAGCACAACCCT      |
| HokB F-12      | CTTGTAATGAAGCACAACCCT      |
| HokB F-13      | AGTCAATCATGAAGCACAACCCT    |
| HokB F-14      | AGTTCCTATGAAGCACAACCCT     |
| HokB F-15      | ATGTCAGCATGAAGCACAACCCT    |
| HokB F-16      | CCGTCCATATGAAGCACAACCCT    |
| HokB F-17      | GTAGAGCATGAAGCACAACCCT     |
| HokB F-18      | GTCCGCAATGAAGCACAACCCT     |
| HokB R         | GGCCTGCACGTCCAGGT          |
| ABE-MU-OFT-1-F | CGACCGCATCTACGACCTCAAC     |
| ABE-MU-OFT-1-R | TGAGCTCCTCCTCGGTGACTG      |
| ABE-MU-OFT-2-F | CCATCACAGGGTCCAGCGAG       |
| ABE-MU-OFT-2-R | TACACAGGTCTCAGCCGAAGC      |
| ABE-MU-OFT-3-F | ATTCATACCGGGGAGAAGCCC      |
| ABE-MU-OFT-3-R | TCGGAAGGCGTTCCTCCTGTG      |
| ABE-MU-OFT-4-F | GGGCAGCATCCACACGGTTAG      |
| ABE-MU-OFT-4-R | CCCC TTCATCCTCTCTGAGCTTG   |
| ABE-MU-OFT-5-F | TTCCCAAGCGGCTGCCGAAG       |
| ABE-MU-OFT-5-R | GGCAGCAGGAACCACCATCCG      |

|                |                         |
|----------------|-------------------------|
| ABE-MU-OFT-6-F | CCTCCTCTGAAGTCACGGAGC   |
| ABE-MU-OFT-6-R | CAGGTCATCCTCTTTGTGGTCAC |
| ABE-MU-OFT-7-F | CTCTTCCGGTTCTAGGCACTTCG |
| ABE-MU-OFT-7-R | TGGGATCTTGGGCTTAACCTCC  |
| ABE-MU-OFT-8-F | ATGACCACCCAGGAAAAGAG    |
| ABE-MU-OFT-8-R | TGGTGCCATCTCCATGTTAC    |
